# Supplementary material for: Declines in mental health associated with air pollution and temperature variability in China
Source: PubMed Central journal article supplement (PMC6520357; doi:10.1038/s41467-019-10196-y), 2019-05-15
Supplement: 41467_2019_10196_MOESM3_ESM.pdf [file 41467_2019_10196_MOESM3_ESM.pdf]

## **Description of Additional Supplementary Files**

### **Supplemental Software:**

Declines in mental health associated with air pollution and temperature variability in China

- 1 Main models: The demo R codes for the main models used in the manuscript.
- 2 (a-c): The R codes to generate the Figures in the manuscript.
- 3 (a-c): The R data to generate the Figures in the manuscript.
